# Supplementary material for: Effect of Feeding Barley, Corn, and a Barley/Corn Blend on Beef Composition and End-Product Palatability
Source: MDPI journal article supplement (doi:10.3390/foods10050977), 2021-04-29
Supplement: s1 [file s1]

Supplementary Table 1. Mean of standardized base peak of non-selected volatile compounds from barley, corn and blended grain-fed beef samples.

| <b>Volatile compounds</b>                        | <b>Barley</b> | <b>Blended</b> | <b>Corn</b> |
|--------------------------------------------------|---------------|----------------|-------------|
| <b>(1-Propyloctyl)benzene</b>                    | 0             | 0.00332523     | 0           |
| <b>(E,E)-2,4-Heptadienal</b>                     | 0.05499927    | 0.04133336     | 0.03616535  |
| <b>(E,E)-2,4-Nonadienal</b>                      | 0.28332775    | 0.28667742     | 0.25596278  |
| <b>(E,Z,Z)-2,4,7-Tridecatrienal</b>              | 0.08266665    | 0.09089641     | 0.06299861  |
| <b>(E,Z)-2,6-Nonadienal</b>                      | 0.01238146    | 0.01163414     | 0.01204181  |
| <b>(E)-2-Nonenal</b>                             | 0.10572931    | 0.09820879     | 0.08462778  |
| <b>(E)-2-Octen-1-ol</b>                          | 0.06625213    | 0.0610077      | 0.05361802  |
| <b>(E)-2-Octenal</b>                             | 0.11104416    | 0.10242353     | 0.10114867  |
| <b>(E)-2-Undecenal</b>                           | 0.24955702    | 0.24918295     | 0.22333874  |
| <b>(E)-3-Tetradecene</b>                         | 0.00017808    | 0.00021921     | 0.00015502  |
| <b>(Z)-11-Octadecenoic acid</b>                  | 0.04269325    | 0.01924938     | 0.02756694  |
| <b>(Z)-9-Hexadecenal</b>                         | 0.14340133    | 0.10446274     | 0.16610462  |
| <b>1-Butanol</b>                                 | 0.00129414    | 6.92E-05       | 0.00086856  |
| <b>1-Chlorohexane</b>                            | 3.48E-05      | 0              | 9.80E-05    |
| <b>1-Decanol</b>                                 | 0.07653255    | 0.07480853     | 0.07170082  |
| <b>1-Dodecanol</b>                               | 0.09016195    | 0.07951297     | 0.11441492  |
| <b>1-Dodecene</b>                                | 0.01205798    | 0.01149578     | 0.0174805   |
| <b>1-Heptanol</b>                                | 0.02653987    | 0.02697966     | 0.02657724  |
| <b>1-Hexanol</b>                                 | 0.00498783    | 0.00420937     | 0.0068452   |
| <b>1-Methoxyhexane</b>                           | 6.16E-05      | 0              | 0.00097507  |
| <b>1-Nonanol</b>                                 | 0.01706481    | 0.0219253      | 0.0159335   |
| <b>1-Nonen-3-ol</b>                              | 0.00034224    | 0.0002438      | 0.00030803  |
| <b>1-Octanol</b>                                 | 0.12030986    | 0.15005288     | 0.10340793  |
| <b>1-Pentadecanol</b>                            | 0.11050303    | 0.09169675     | 0.09990376  |
| <b>1-Pentanol</b>                                | 0.01401083    | 0.0095234      | 0.01230314  |
| <b>1-Tridecanol</b>                              | 0.05989379    | 0.06802657     | 0.07152793  |
| <b>1-Undecene</b>                                | 0.00408847    | 0.00449256     | 0.00796533  |
| <b>1,2-Dimethyl naphthalene</b>                  | 0.00480856    | 0.00762257     | 0.00302381  |
| <b>1,4-Dichlorobenzene</b>                       | 0.0030849     | 0.00706748     | 0.01064631  |
| <b>1,6,7-Trimethyl naphthalene</b>               | 0.00529654    | 0.0066039      | 0.00129754  |
| <b>2-Butylfuran</b>                              | 0.00029787    | 1.69E-05       | 0.00077348  |
| <b>2-Decanone</b>                                | 0.05808011    | 0.08574807     | 0.10241707  |
| <b>2-Decenal</b>                                 | 0.30571662    | 0.3068575      | 0.25806928  |
| <b>2-Ethyl-1-hexanol</b>                         | 0.24878587    | 0.29594167     | 0.21564291  |
| <b>2-Ethyl-3-hydroxyhexyl 2-methylpropanoate</b> | 0.10099326    | 0.12089483     | 0.09815403  |
| <b>2-Heptanone</b>                               | 0.01773103    | 0.01700561     | 0.02372422  |

|                                            |            |            |            |
|--------------------------------------------|------------|------------|------------|
| 2-Heptenal                                 | 0.04106154 | 0.03741087 | 0.04432526 |
| 2-Methyl naphthalene                       | 0.00217512 | 0.00292765 | 0.00158533 |
| 2-Methyl-3-octanone                        | 0.01234288 | 0.01661276 | 0.00026971 |
| 2-Methyldecane                             | 0.00059393 | 0          | 0.00013222 |
| 2-Nonanone                                 | 0.02467708 | 0.03321998 | 0.03957208 |
| 2-Octanone                                 | 0.01764542 | 0.02990792 | 0.0271451  |
| 2-Pentylfuran                              | 0.10923132 | 0.08502066 | 0.08977243 |
| 2-Pentylpyridine                           | 0.00056325 | 0.00333918 | 0.00301594 |
| 2-Pentylthiazolidine                       | 0.00182309 | 0.00483585 | 0.00206357 |
| 2-Propylfuran                              | 9.76E-06   | 4.24E-05   | 1.67E-05   |
| 2-Tridecanone                              | 0.01124647 | 0.01446584 | 0.00796469 |
| 2,3-Butanediol                             | 0.0020966  | 0.00091167 | 0.0032503  |
| 2,3-Dimethylheptane                        | 0          | 0.00030163 | 0.00014676 |
| 2,3,5-Trimethyl-6-(3-methylbutyl)-pyrazine | 0.01382519 | 0.01283311 | 0.00389287 |
| 2,4-Decadienal                             | 0.07055069 | 0.05460991 | 0.05737823 |
| 2,4-Di-tert-butylphenol                    | 0.06360755 | 0.06827365 | 0.04963654 |
| 2,6-Diethylpyrazine                        | 0.05428039 | 0.03589811 | 0.0578025  |
| 3-Ethyl-2,5-dimethylpyrazine               | 0.11796493 | 0.11534369 | 0.11352501 |
| 3-Ethyltridecane                           | 0          | 0          | 0.00027011 |
| 3-Isopropyl-6-methylcyclohexene            | 0.00343067 | 0.00338338 | 0.00323647 |
| 3-Methylbutanal                            | 0.00037408 | 0.00027464 | 0.0022048  |
| 3-Methylbutanoic acid                      | 0.01050637 | 0.01029879 | 0.03054749 |
| 3-Methyldecane                             | 0.02467418 | 0.02464789 | 0.02511667 |
| 3-Methylpentadecane                        | 0.01870563 | 0.01393278 | 0.01670807 |
| 3-Nonanone                                 | 0.00107067 | 0.00171047 | 0.00305039 |
| 3-Octanone                                 | 0.03496251 | 0.07828504 | 0.02919882 |
| 3-Octen-2-one                              | 0.01596934 | 0.01564072 | 0.01527915 |
| 3,5-Octadien-2-one                         | 0.01354954 | 0.01053318 | 0.00766336 |
| 4-Ethylbenzaldehyde                        | 0.00346906 | 0.00445898 | 0.00648113 |
| 4-Methylbenzaldehyde                       | 0.00769432 | 0.01143141 | 0.01130213 |
| 4-Methyloctane                             | 0.00050061 | 0          | 0.00010317 |
| 4-Methylundecane                           | 0.00840369 | 0.00658492 | 0.00354822 |
| 4-Nonenal                                  | 0.00795226 | 0.00797187 | 0.00611341 |
| 4-Pentylbenzaldehyde                       | 0.00038692 | 0.00036184 | 0.00032399 |
| 5-Ethyl-1-formylcyclopentene               | 0.00281997 | 0.00220514 | 0.00234619 |
| 5-Ethyl-2,3-dimethylpyrazine               | 0.01887504 | 0.01377539 | 0.01614535 |
| a-Phellandrene                             | 0.00093466 | 0.00083367 | 0.00041687 |
| a-Thujene                                  | 0.00071281 | 0.00045411 | 0.00048278 |
| alpha-Pinene                               | 0.00018558 | 9.48E-05   | 5.33E-05   |
| Benzaldehyde                               | 0.04903391 | 0.04322561 | 0.115082   |

|                                       |            |            |            |
|---------------------------------------|------------|------------|------------|
| <b>Benzophenone</b>                   | 0.10045945 | 0.10143332 | 0.08136893 |
| <b>Butylated hydroxytoluene</b>       | 0.03916871 | 0.03909776 | 0.03862474 |
| <b>Butylbenzene</b>                   | 0.00103687 | 0.00105527 | 0.00064697 |
| <b>Cumene</b>                         | 0.00016619 | 6.81E-05   | 0.01045251 |
| <b>Cuminaldehyde</b>                  | 0.04257936 | 0.03255089 | 0.05625314 |
| <b>Decanal</b>                        | 0.15972425 | 0.20421371 | 0.19099754 |
| <b>Decane</b>                         | 0.08287893 | 0.06827568 | 0.06984981 |
| <b>delta-Dodecalactone</b>            | 0.13047779 | 0.14145568 | 0.17644468 |
| <b>Diethyl phthalate</b>              | 0.00119453 | 0.03295124 | 0.01826625 |
| <b>Dodecanal</b>                      | 0.04529935 | 0.06101603 | 0.06012344 |
| <b>Dodecane</b>                       | 0.11172172 | 0.10632746 | 0.13376063 |
| <b>Ethylbenzene</b>                   | 0.00073006 | 0.00577932 | 0.00338862 |
| <b>gamma-Dodecalactone</b>            | 0.00198574 | 0.01017237 | 0.01459433 |
| <b>Geranyl acetone</b>                | 0.00524871 | 0.00345733 | 0.00299319 |
| <b>Heptanal</b>                       | 0.07394428 | 0.06547291 | 0.08355403 |
| <b>Hexadecanol</b>                    | 0.08064339 | 0.05263048 | 0.05274285 |
| <b>Hexanoic acid</b>                  | 0.0533213  | 0.04415529 | 0.04103461 |
| <b>Lavender lactone</b>               | 0.00037125 | 0.00011406 | 0.00075154 |
| <b>Limonene</b>                       | 0.01505815 | 0.01563024 | 0.01573955 |
| <b>Linoleic acid</b>                  | 0.30903734 | 0.33055693 | 0.3196548  |
| <b>m-Cymene</b>                       | 0.00049359 | 0.00073274 | 0.0006557  |
| <b>m-Di-tert-butylbenzene</b>         | 0.13545305 | 0.22965784 | 0.15466738 |
| <b>Menthol</b>                        | 0.01031245 | 0.00923616 | 0.00764156 |
| <b>Methyl 14-methylpentadecanoate</b> | 0          | 0          | 0.01540491 |
| <b>Methyl 2-methylbutanoate</b>       | 0          | 0.00014216 | 0.00012372 |
| <b>Methyl butanoate</b>               | 4.47E-05   | 0.00033557 | 0.00024663 |
| <b>Methyl heptadecanoate</b>          | 0.03502186 | 0.00487121 | 0.01967373 |
| <b>Methyl heptanoate</b>              | 0          | 0.00063092 | 0.00201756 |
| <b>Methyl heptenone</b>               | 0.00522021 | 0.00627568 | 0.00766315 |
| <b>Methyl hexadecanoate</b>           | 0.01018253 | 0.02315767 | 0.07201593 |
| <b>Methyl hexanoate</b>               | 0.00029073 | 0.00039229 | 0.00025951 |
| <b>Methyl methacrylate</b>            | 0.00158871 | 0          | 0          |
| <b>Methyl nonanoate</b>               | 0          | 0.00046903 | 0.00036017 |
| <b>n-Octyl-cyclopropane</b>           | 0.00593461 | 0.00998917 | 0.01253052 |
| <b>N,N-dibutylformamide</b>           | 0.01391581 | 0.04061697 | 0.0114125  |
| <b>Naphthalene</b>                    | 0.0014595  | 0.00382006 | 0.00612689 |
| <b>Nerylacetone</b>                   | 0.14072093 | 0.14940974 | 0.14007209 |
| <b>Nonanal</b>                        | 1          | 1          | 1          |
| <b>Nonane</b>                         | 0.0246675  | 0.04101522 | 0.02512359 |
| <b>Nonanoic acid</b>                  | 0.06134177 | 0.05133886 | 0.05411756 |

|                           |            |            |            |
|---------------------------|------------|------------|------------|
| <b>o-Xylene</b>           | 0.12194869 | 0.22104332 | 0.07254382 |
| <b>Octanal</b>            | 0.1778603  | 0.16451656 | 0.17346796 |
| <b>Octane</b>             | 0.02903676 | 0.0337197  | 0.04397178 |
| <b>Octylbenzene</b>       | 0.00013631 | 0          | 0          |
| <b>p-Cymene</b>           | 0.00070204 | 0.00066704 | 0.03740108 |
| <b>p-Cymenene</b>         | 0.00011324 | 0.00022223 | 0.00107483 |
| <b>p-Menth-1-ene</b>      | 8.43E-05   | 5.94E-05   | 0.00019037 |
| <b>p-Xylene</b>           | 0          | 6.08E-05   | 0          |
| <b>Pentadecanal</b>       | 0          | 0.00827225 | 0.0041366  |
| <b>Pentadecane</b>        | 0.34489306 | 0.31620468 | 0.29745938 |
| <b>Pentanal</b>           | 0.01111604 | 0.00632123 | 0.01562523 |
| <b>Piperitone</b>         | 0.00871853 | 7.90E-05   | 0.00330094 |
| <b>Styrene</b>            | 0.00620501 | 0.00273912 | 0.06894263 |
| <b>Sylvestrene</b>        | 0.00469711 | 0.00658357 | 0.0044721  |
| <b>Tetradecanal</b>       | 0.39282653 | 0.30925241 | 0.33889347 |
| <b>Tetradecane</b>        | 0.40207969 | 0.44571282 | 0.39424631 |
| <b>Tetradecanoic acid</b> | 0          | 0.00280659 | 0.00015315 |
| <b>Thiazole</b>           | 0          | 0.0002258  | 6.35E-05   |
| <b>Toluene</b>            | 0.00328304 | 0.00254391 | 0.00526583 |
| <b>Tributyl phosphate</b> | 0.35034535 | 0.36013174 | 0.33103306 |
| <b>Tridecanal</b>         | 0.24511573 | 0.20445514 | 0.19509785 |
| <b>Tridecane</b>          | 0.08486665 | 0.09479349 | 0.09177113 |
| <b>Trimethylpyrazine</b>  | 0.08439273 | 0.07161438 | 0.07376284 |
| <b>Undecanal</b>          | 0.06974575 | 0.08943401 | 0.08598671 |

---
