# Supplementary material for: Effect of Feeding Barley, Corn, and a Barley/Corn Blend on Beef Composition and End-Product Palatability
Source: MDPI journal article supplement (doi:10.3390/foods10050977), 2021-04-29
Supplement: s1 [file s1]

Supplementary table 2. Mean and standard deviation of sensory descriptive and flavour profile attributes from barley, corn and blended grain-fed beef samples.

|                                       | Barley    | Blended   | Corn      |
|---------------------------------------|-----------|-----------|-----------|
| <i>Sensory descriptive attributes</i> |           |           |           |
| Initial Tenderness                    | 6.15±1.31 | 5.94±1.37 | 6.35±1.03 |
| Initial Juiciness                     | 5.06±1.09 | 4.86±1.21 | 4.55±0.99 |
| Beef Flavour Intensity                | 5.29±0.64 | 5.89±0.62 | 5.46±0.60 |
| Off-Flavour Intensity                 | 7.20±1.23 | 7.65±1.49 | 7.75±1.24 |
| Connective Tissue                     | 8.36±1.23 | 8.01±1.03 | 8.33±0.51 |
| Overall Tenderness                    | 6.58±1.11 | 6.37±1.23 | 6.62±0.89 |
| Sustainable Juiciness                 | 5.10±0.72 | 5.08±0.70 | 4.83±0.77 |
| <i>Flavour profile</i>                |           |           |           |
| <i>Aroma attributes</i>               |           |           |           |
| Beef identity                         | 4.76±0.80 | 4.68±0.88 | 4.80±0.82 |
| Barnyard                              | 2.50±0.82 | 2.12±0.62 | 2.63±0.71 |
| Bloody-serumy                         | 1.88±1.09 | 2.05±0.48 | 2.02±0.79 |
| Brown-roasted                         | 3.83±0.73 | 3.82±0.60 | 3.60±0.92 |
| Burnt                                 | 2.40±0.69 | 2.82±0.71 | 2.07±0.69 |
| Buttery                               | 2.94±0.42 | 2.62±0.64 | 2.69±0.50 |
| Corn                                  | 2.35±1.14 | 1.89±0.61 | 2.26±1.16 |
| Cruciferous                           | 2.52±0.61 | 2.76±1.03 | 2.66±1.13 |
| Fat-like                              | 2.49±0.51 | 2.41±0.50 | 2.28±0.66 |
| Grainy                                | 2.04±0.85 | 2.21±0.75 | 1.86±0.65 |
| Green-hay                             | 2.34±0.98 | 2.72±0.85 | 2.72±0.95 |
| Liver-like                            | 2.06±1.32 | 2.17±0.88 | 2.73±1.00 |
| Metallic                              | 1.66±0.32 | 2.15±1.82 | 2.54±1.20 |
| Sour-dairy                            | 2.78±1.16 | 3.40±1.19 | 2.50±0.47 |
| Stale-cardboard                       | 2.63±0.81 | 3.00±2.40 | -         |
| Other                                 | 3.72±0.41 | 4.56±2.12 | 4.32±1.47 |
| Unidentified                          | 4.25±1.46 | 3.86±0.83 | 3.82±1.84 |
| <i>Taste attributes</i>               |           |           |           |
| Salty                                 | 2.45±0.51 | 2.36±0.47 | 2.45±0.49 |
| Sour                                  | 3.42±0.87 | 3.55±0.87 | 3.42±0.87 |
| Sweet                                 | 3.00±1.76 | 3.02±1.74 | 3.00±1.33 |
| Bitter                                | 2.48±0.85 | 2.46±0.70 | 2.48±0.87 |
| Umami                                 | 2.84±0.64 | 2.77±0.60 | 2.84±0.58 |
| <i>Flavour attributes</i>             |           |           |           |
| Beef identity                         | 5.07±0.70 | 5.33±0.60 | 5.45±0.64 |
| Barnyard                              | 2.74±1.29 | 2.39±0.37 | 2.48±0.30 |

|                 |           |           |           |
|-----------------|-----------|-----------|-----------|
| Bloody-serumy   | 3.48±1.47 | 3.05±1.45 | 2.88±1.26 |
| Brown-roasted   | 3.22±0.62 | 3.23±0.74 | 3.40±0.68 |
| Burnt           | 3.75±0.91 | 3.60±2.22 | 2.20±0.14 |
| Buttery         | 2.43±0.61 | 2.38±0.53 | 2.48±0.53 |
| Corn            | 2.07±0.92 | 2.19±0.56 | 1.84±0.63 |
| Cruciferous     | 2.38±0.74 | 2.83±0.87 | 2.42±1.10 |
| Fat-like        | 2.55±0.61 | 2.51±0.43 | 2.36±0.82 |
| Grainy          | 2.08±0.89 | 2.03±0.57 | 2.22±0.82 |
| Green-hay       | 5.06±1.41 | 4.56±1.32 | 4.50±2.01 |
| Liver-like      | 2.60±1.29 | 2.92±1.29 | 2.71±1.38 |
| Metallic        | 2.42±0.86 | 1.90±1.02 | 2.24±1.09 |
| Oily            | 1.25±0.07 | 1.52±0.53 | 2.30±0.45 |
| Rancid          | -         | 2.13±0.65 | 1.6       |
| Sour-dairy      | 4.10±1.17 | 3.96±1.17 | 3.71±1.21 |
| Stale-cardboard | 3.15±1.46 | 2.93±1.45 | 3.21±1.50 |
| Other           | 4.50±1.55 | 6.05±2.33 | 3.1       |
| Unidentified    | 4.69±0.89 | 3.95±0.61 | 4.38±1.51 |
